# Supplementary material for: Design and synthesis of Ba3SiSe5 with suitable birefringence modulated via MIV atoms in the Ba–MIV–Q (MIV = Si, Ge; Q = S, Se) system
Source: Royal Society of Chemistry journal article supplement (doi:10.1039/d1dt01747k), 2021-01-01
Supplement: d1dt01747k1.pdf [file d1dt01747k1.pdf]

*Electronic Supplementary Information:*

**Design and synthesis of Ba<sub>3</sub>SiSe<sub>5</sub> with suitable birefringence modulated via M<sup>IV</sup> atoms in Ba-M<sup>IV</sup>-Q (M<sup>IV</sup> = Si, Ge; Q = S, Se) system**

Huanhuan Cheng,<sup>a,b,‡</sup> Abudukadi Tudi,<sup>a,b,‡</sup> Peng Wang,<sup>a</sup> Kewang Zhang,<sup>a</sup> Zhihua Yang<sup>a,b,\*</sup> and

Shilie Pan<sup>a,b,\*</sup>

<sup>a</sup> CAS Key Laboratory of Functional Materials and Devices for Special Environments; Xinjiang Technical Institute of Physics & Chemistry, CAS; Xinjiang Key Laboratory of Electronic Information Materials and Devices, 40-1 South Beijing Road, Urumqi 830011, China.

<sup>b</sup> Center of Materials Science and Optoelectronics Engineering, University of Chinese Academy of Sciences, Beijing 100049, China.

<sup>‡</sup> These authors contributed equally to this work.

\* Corresponding authors: zhyang@ms.xjb.ac.cn; slpan@ms.xjb.ac.cn.

**Contents**

**Table S1** Atomic coordinates and equivalent isotropic displacement parameters (Å<sup>2</sup>) for Ba<sub>3</sub>SiSe<sub>5</sub>.

**Table S2** Interatomic distance (Å) and angles in Ba<sub>3</sub>SiSe<sub>5</sub>.

**Table S3** Mulliken bond population in Ba<sub>3</sub>SiSe<sub>5</sub>.

**Table S4** Crystallographic structure data of the Ba-M<sup>IV</sup>-Q (M<sup>IV</sup> = Si, Ge; Q = S, Se) system.

**Table S5** Bond valence sums in Ba<sub>3</sub>SiSe<sub>5</sub>, Ba<sub>3</sub>SiS<sub>5</sub> and Ba<sub>3</sub>GeS<sub>5</sub>.

**Fig. S1** The energy dispersive X-ray spectroscopy (EDX) pattern.

**Fig. S2** Asymmetric unit and selected symmetry-equivalent atoms in Ba<sub>3</sub>SiSe<sub>5</sub>.

**Fig. S3** The real-space atom-cutting analysis of Ba<sub>3</sub>SiSe<sub>5</sub>.

**Fig. S4** Electron localization function (ELF) diagram of Ba<sub>3</sub>SiSe<sub>5</sub>.

**Fig. S5** Calculated band gaps of Ba<sub>3</sub>SiS<sub>5</sub> (a), Ba<sub>3</sub>GeS<sub>5</sub> (b), Ba<sub>2</sub>GeS<sub>4</sub> (c), Ba<sub>2</sub>SiS<sub>4</sub> (d), Ba<sub>2</sub>GeSe<sub>4</sub> (e) and Ba<sub>2</sub>SiSe<sub>4</sub> (f).

**Fig. S6** Partial density of states (PDOS) of Ba<sub>3</sub>SiS<sub>5</sub> (a), Ba<sub>3</sub>GeS<sub>5</sub> (b), Ba<sub>2</sub>GeS<sub>4</sub> (c), Ba<sub>2</sub>SiS<sub>4</sub> (d), Ba<sub>2</sub>GeSe<sub>4</sub> (e) and Ba<sub>2</sub>SiSe<sub>4</sub> (f).

**Theoretical Calculations of other compounds in Ba-M<sup>IV</sup>-Q (M<sup>IV</sup> = Si, Ge; Q = S, Se) system.** Utilized the plane wave pseudopotential method implemented in the CASTEP package, the first principle calculation of other compounds in Ba-M<sup>IV</sup>-Q (M<sup>IV</sup> = Si, Ge; Q = S, Se) system based on the density functional theory (DFT) were carried out. The exchange-correlation functional was executed by Perdew-Burke-Ernzerh (PBE) of functions within the generalized gradient approximation (GGA). The norm-conserving pseudopotentials (NCP) were selected for structural optimization and calculating the properties of electronic and optical. The following electronic configurations were treated as: Ba  $5s^25p^66s^2$ , Si  $3s^23p^2$ , Se  $4s^24p^4$ , Ge  $4s^24p^2$ , S  $3s^23p^4$ , the cutoff energy was set to 720 eV for Ba<sub>3</sub>SiS<sub>5</sub>, Ba<sub>3</sub>GeS<sub>5</sub> Ba<sub>2</sub>GeS<sub>4</sub> and Ba<sub>2</sub>SiS<sub>4</sub>, 440 eV for Ba<sub>2</sub>GeSe<sub>4</sub> and Ba<sub>2</sub>SiSe<sub>4</sub>, respectively. Furthermore, to reach the convergence of this calculations, the Brillouin zone comprised of Monkhorst-Pack  $k$ -point sampling with a separation was set as:  $3 \times 3 \times 3$  and  $0.03 \text{ \AA}^{-1}$  for Ba<sub>3</sub>SiS<sub>5</sub> and Ba<sub>3</sub>GeS<sub>5</sub>,  $4 \times 5 \times 3$  and  $0.03 \text{ \AA}^{-1}$  for Ba<sub>2</sub>GeS<sub>4</sub> and Ba<sub>2</sub>SiS<sub>4</sub>,  $4 \times 4 \times 3$  and  $0.04 \text{ \AA}^{-1}$  for Ba<sub>2</sub>GeSe<sub>4</sub> and Ba<sub>2</sub>SiSe<sub>4</sub>, respectively. The other calculation parameters and convergent criteria were employed as the default values of the CASTEP code.

**Table S1** Atomic coordinates and equivalent isotropic displacement parameters ( $\text{\AA}^2$ ) for  $\text{Ba}_3\text{SiSe}_5$ .

| <b>Atom</b> | <b>Wyckoff position</b> | <b>x</b> | <b>y</b> | <b>z</b> | <b>U<sub>eq</sub> (<math>\text{\AA}^2</math>)</b> |
|-------------|-------------------------|----------|----------|----------|---------------------------------------------------|
| Ba1         | 4c                      | 4778(1)  | 7500     | 8867(1)  | 14(1)                                             |
| Ba2         | 8d                      | 6812(1)  | 4822(1)  | 5751(1)  | 21(1)                                             |
| Se1         | 4c                      | 2212(1)  | 2500     | 6516(2)  | 13(1)                                             |
| Se2         | 4c                      | 4969(1)  | 2500     | 4818(2)  | 14(1)                                             |
| Se3         | 8d                      | 4454(1)  | 4376(1)  | 8199(1)  | 16(1)                                             |
| Se4         | 4c                      | 7344(1)  | 7500     | 8150(2)  | 21(1)                                             |
| Si          | 4c                      | 4011(3)  | 2500     | 6941(4)  | 7(1)                                              |

**Table S2** Interatomic distance (Å) and angles in Ba<sub>3</sub>SiSe<sub>5</sub>.

| Atoms       | Interatomic Distance (Å) or Angles (deg) | Atoms          | Interatomic Distance (Å) or Angles (deg) |
|-------------|------------------------------------------|----------------|------------------------------------------|
| Ba1-Se3(×2) | 3.1727(12)                               | Ba2-Se3        | 3.6885(13)                               |
| Ba1-Se3(×2) | 3.3556(14)                               | Ba2-Se4        | 3.4354(14)                               |
| Ba1-Se4     | 3.2545(19)                               | Ba2-Se4        | 3.4733(13)                               |
| Ba1-Se4     | 3.5249(18)                               | Si-Se1         | 2.269(4)                                 |
| Ba1-Se2     | 3.3154(17)                               | Si-Se3(×2)     | 2.239(2)                                 |
| Ba1-Se1     | 3.4287(17)                               | Si-Se2         | 2.244(4)                                 |
| Ba2-Se1     | 3.3923(13)                               | Se3-Si-Se3     | 111.88(16)                               |
| Ba2-Se1     | 3.5511(12)                               | Se3-Si-Se2(×2) | 107.18(11)                               |
| Ba2-Se2     | 3.4905(12)                               | Se3-Si-Se1(×2) | 109.09(11)                               |
| Ba2-Se2     | 3.3502(13)                               | Se2-Si-Se1     | 112.44(15)                               |
| Ba2-Se3     | 3.4449(14)                               |                |                                          |

**Table S3** Mulliken bond populations in Ba<sub>3</sub>SiSe<sub>5</sub>.

| Compounds                         | Bond  | Population |
|-----------------------------------|-------|------------|
| Ba <sub>3</sub> SiSe <sub>5</sub> | Ba-Se | 0.03-0.18  |
|                                   | Si-Se | 0.38-0.46  |

**Table S4** Crystallographic structure data of the Ba-M<sup>IV</sup>-Q (M<sup>IV</sup> = Si, Ge; Q = S, Se) system.

| Compounds                                                      | Space group  | Band gap (eV) |       | Birefringence | Volume (Å <sup>3</sup> ) | Unit cell dimensions (Å)                                   |
|----------------------------------------------------------------|--------------|---------------|-------|---------------|--------------------------|------------------------------------------------------------|
|                                                                |              | GGA           | HSE06 |               |                          |                                                            |
| Ba <sub>3</sub> SiSe <sub>5</sub>                              | <i>Pnma</i>  | 2.30          | 3.07  | 0.044         | 1101.4                   | 12.436(3), 9.889(2),<br>8.9564(19)                         |
| Ba <sub>3</sub> SiS <sub>5</sub> <sup>[1]</sup>                | <i>Pnma</i>  | 2.83          | 3.60  | 0.036         | 987.67                   | 12.121(10), 9.527(8),<br>8.553(8)                          |
| Ba <sub>3</sub> GeS <sub>5</sub> <sup>[2]</sup>                | <i>Pnma</i>  | 2.20          | 3.08  | 0.050         | 989.62                   | 12.053(9), 9.550(7),<br>8.600(6)                           |
| Ba <sub>2</sub> GeS <sub>4</sub> <sup>[3]</sup>                | <i>Pnma</i>  | 2.40          | 3.37  | 0.078         | 754.74                   | 8.983(11), 6.875(9),<br>12.221(16)                         |
| Ba <sub>2</sub> SiS <sub>4</sub> <sup>[4]</sup>                | <i>Pnma</i>  | 3.05          | 4.04  | 0.051         | 727.44                   | 8.930(9), 6.782(4),<br>12.011(8)                           |
| Ba <sub>2</sub> GeSe <sub>4</sub> <sup>[5]</sup>               | <i>P2/m</i>  | 1.71          | 2.60  | 0.067         | 430.11                   | 7.000(4), 7.094(4),<br>9.174(6), $\beta =$<br>109.14(10)   |
| Ba <sub>2</sub> SiSe <sub>4</sub> <sup>[6]</sup>               | <i>P2/m</i>  | 2.43          | 3.25  | 0.060         | 419.18                   | 9.184(5), 7.033(3),<br>6.872(3), $\beta =$ 109.2(1)        |
| Ba <sub>2</sub> Ge <sub>2</sub> Se <sub>5</sub> <sup>[7]</sup> | <i>Pnma</i>  | /             | /     | /             | 1058.32                  | 12.594(3), 9.174(2),<br>9.160(2)                           |
| Ba <sub>2</sub> Ge <sub>4</sub> S <sub>10</sub> <sup>[8]</sup> | <i>Fd3-m</i> | /             | /     | /             | 3307.28                  | 14.899(2), 14.899(2),<br>14.899(2)                         |
| Ba <sub>2</sub> Ge <sub>2</sub> S <sub>6</sub> <sup>[9]</sup>  | <i>P2/c</i>  | /             | /     | /             | 1070.72                  | 15.376(6), 5.761(17),<br>13.420(4), $\beta =$<br>115.72(2) |

**Table S5** Bond valence sums in Ba<sub>3</sub>SiSe<sub>5</sub>, Ba<sub>3</sub>SiS<sub>5</sub><sup>[1]</sup> and Ba<sub>3</sub>GeS<sub>5</sub><sup>[2]</sup>.

| Ba <sub>3</sub> SiSe <sub>5</sub> |     | Ba <sub>3</sub> SiS <sub>5</sub> |     | Ba <sub>3</sub> GeS <sub>5</sub> |     |
|-----------------------------------|-----|----------------------------------|-----|----------------------------------|-----|
| Ba1                               | 2.5 | Ba1                              | 1.8 | Ba1                              | 1.7 |
| Ba2                               | 1.6 | Ba2                              | 2.5 | Ba2                              | 2.6 |
| Si                                | 4.1 | Si                               | 3.7 | Ge                               | 4.3 |
| Se1                               | 2.0 | S1                               | 2.1 | S1                               | 2.2 |
| Se2                               | 2.3 | S2                               | 2.2 | S2                               | 2.3 |
| Se3                               | 2.2 | S3                               | 1.3 | S3                               | 2.1 |
| Se4                               | 1.4 | S4                               | 2.0 | S4                               | 1.4 |

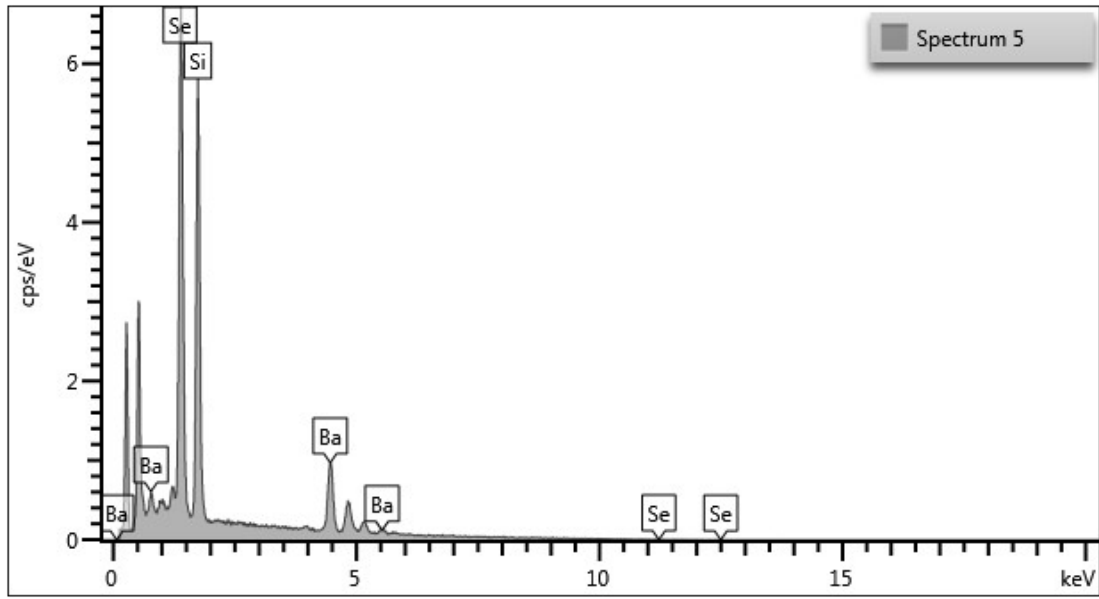

**Fig. S1** The energy dispersive X-ray spectroscopy (EDX) pattern.



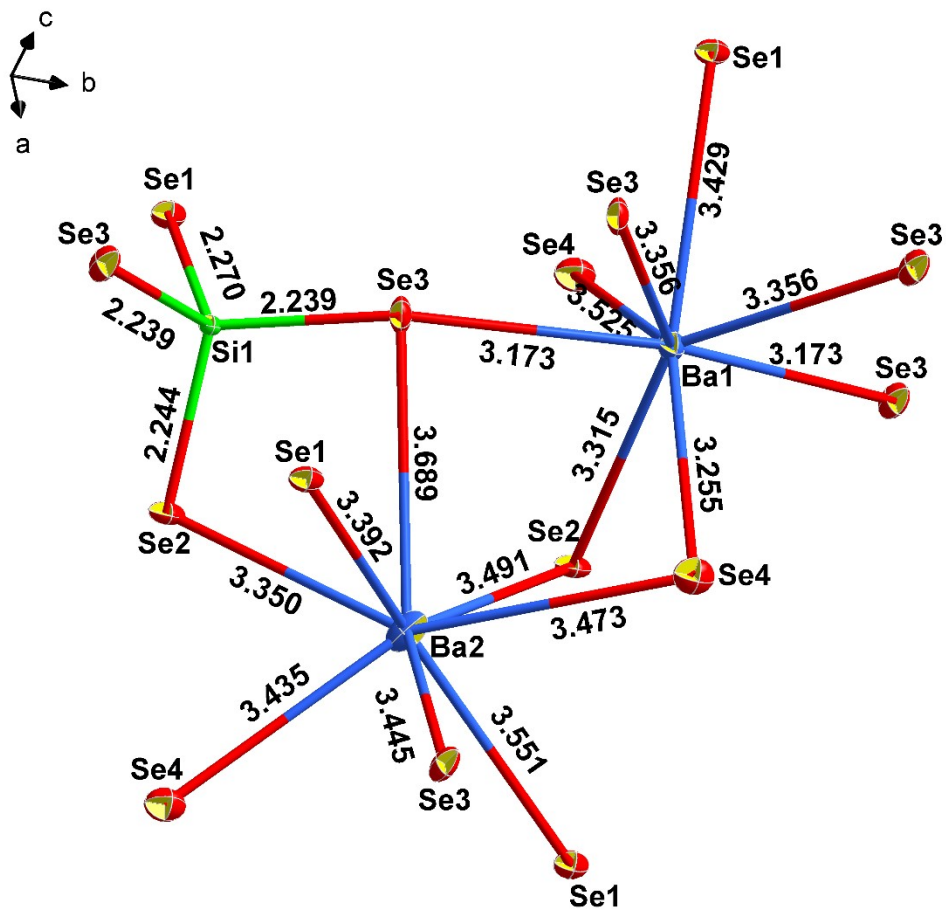

Fig. S2 Asymmetric unit and selected symmetry-equivalent atoms in Ba<sub>3</sub>SiSe<sub>5</sub>.

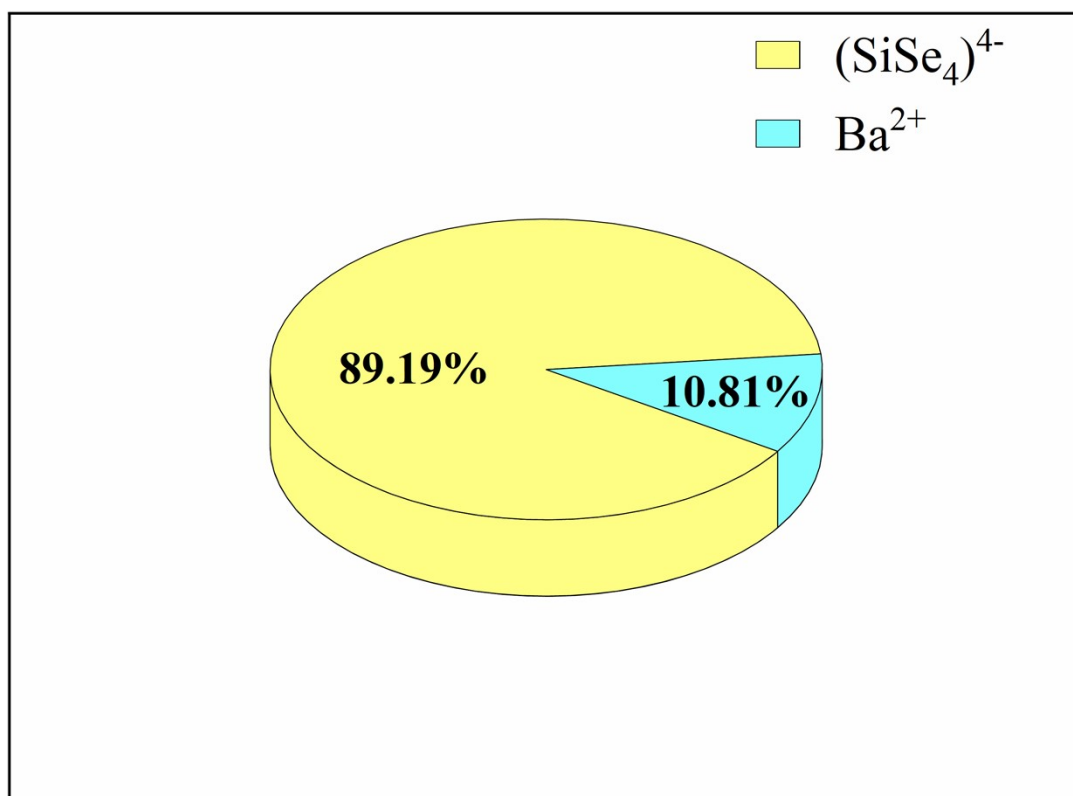

**Fig. S3** The real-space atom-cutting analysis of Ba<sub>3</sub>SiSe<sub>5</sub>.

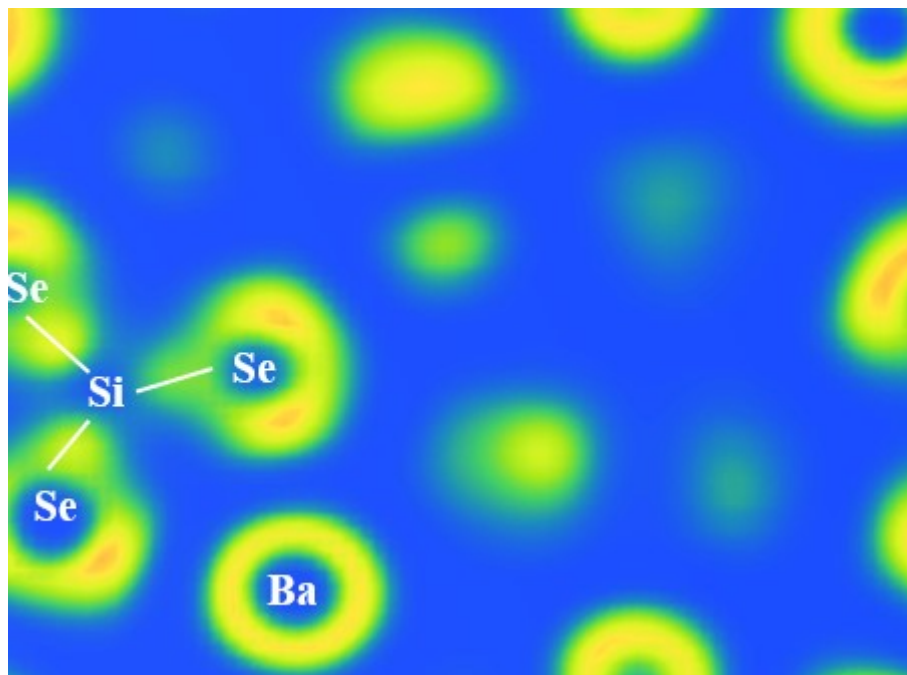

**Fig. S4** Electron localization function (ELF) diagram of Ba<sub>3</sub>SiSe<sub>5</sub>.

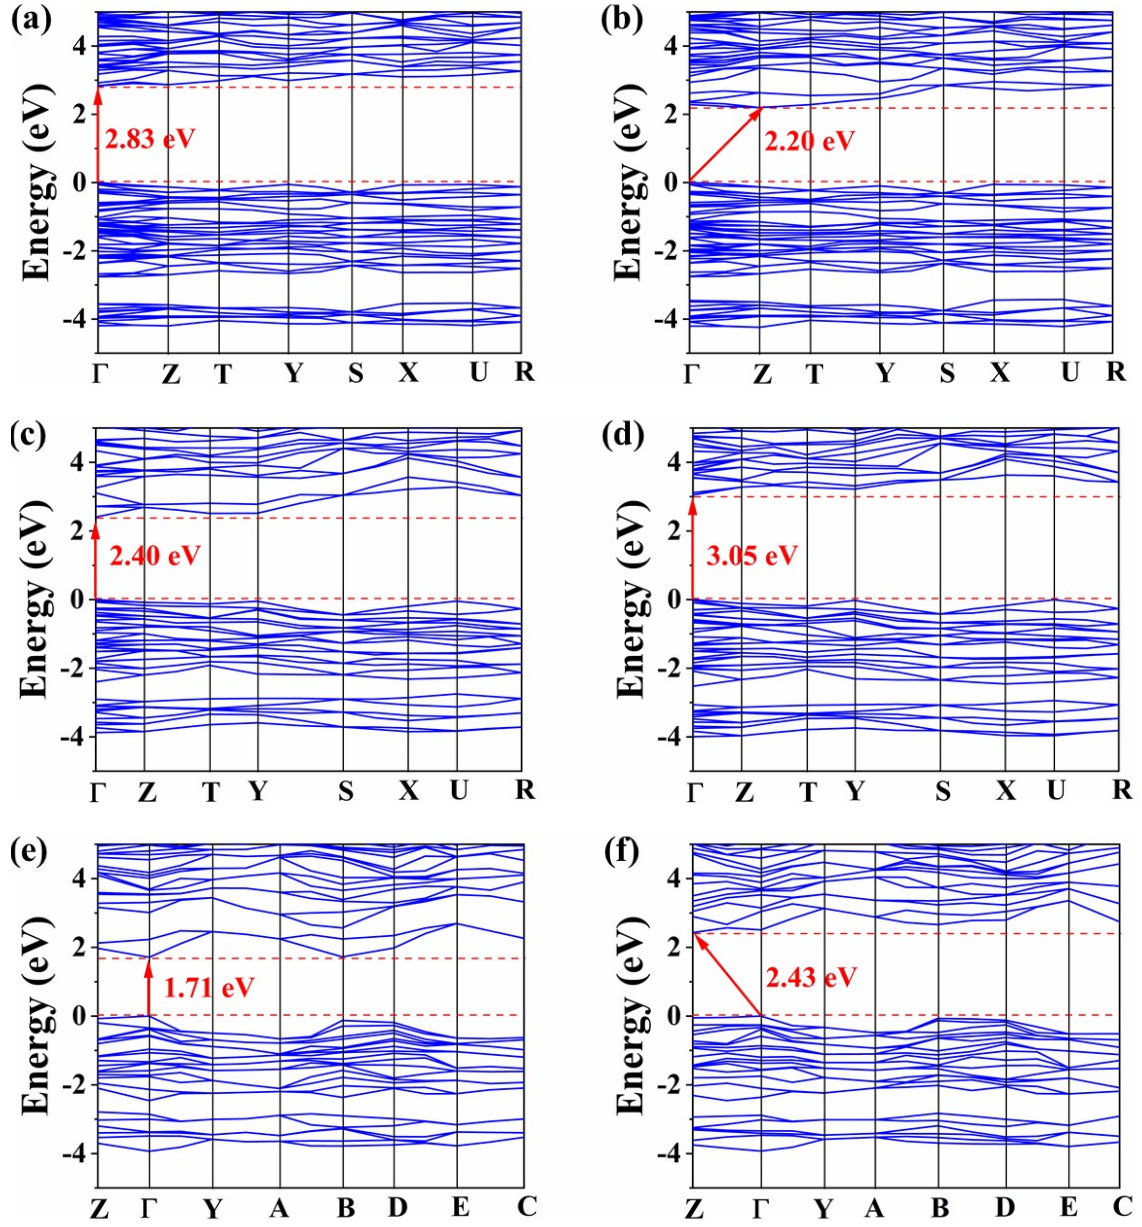

**Fig. S5** Calculated band gaps of  $\text{Ba}_3\text{SiS}_5$  (a),  $\text{Ba}_3\text{GeS}_5$  (b),  $\text{Ba}_2\text{GeS}_4$  (c),  $\text{Ba}_2\text{SiS}_4$  (d),  $\text{Ba}_2\text{GeSe}_4$  (e) and  $\text{Ba}_2\text{SiSe}_4$  (f).

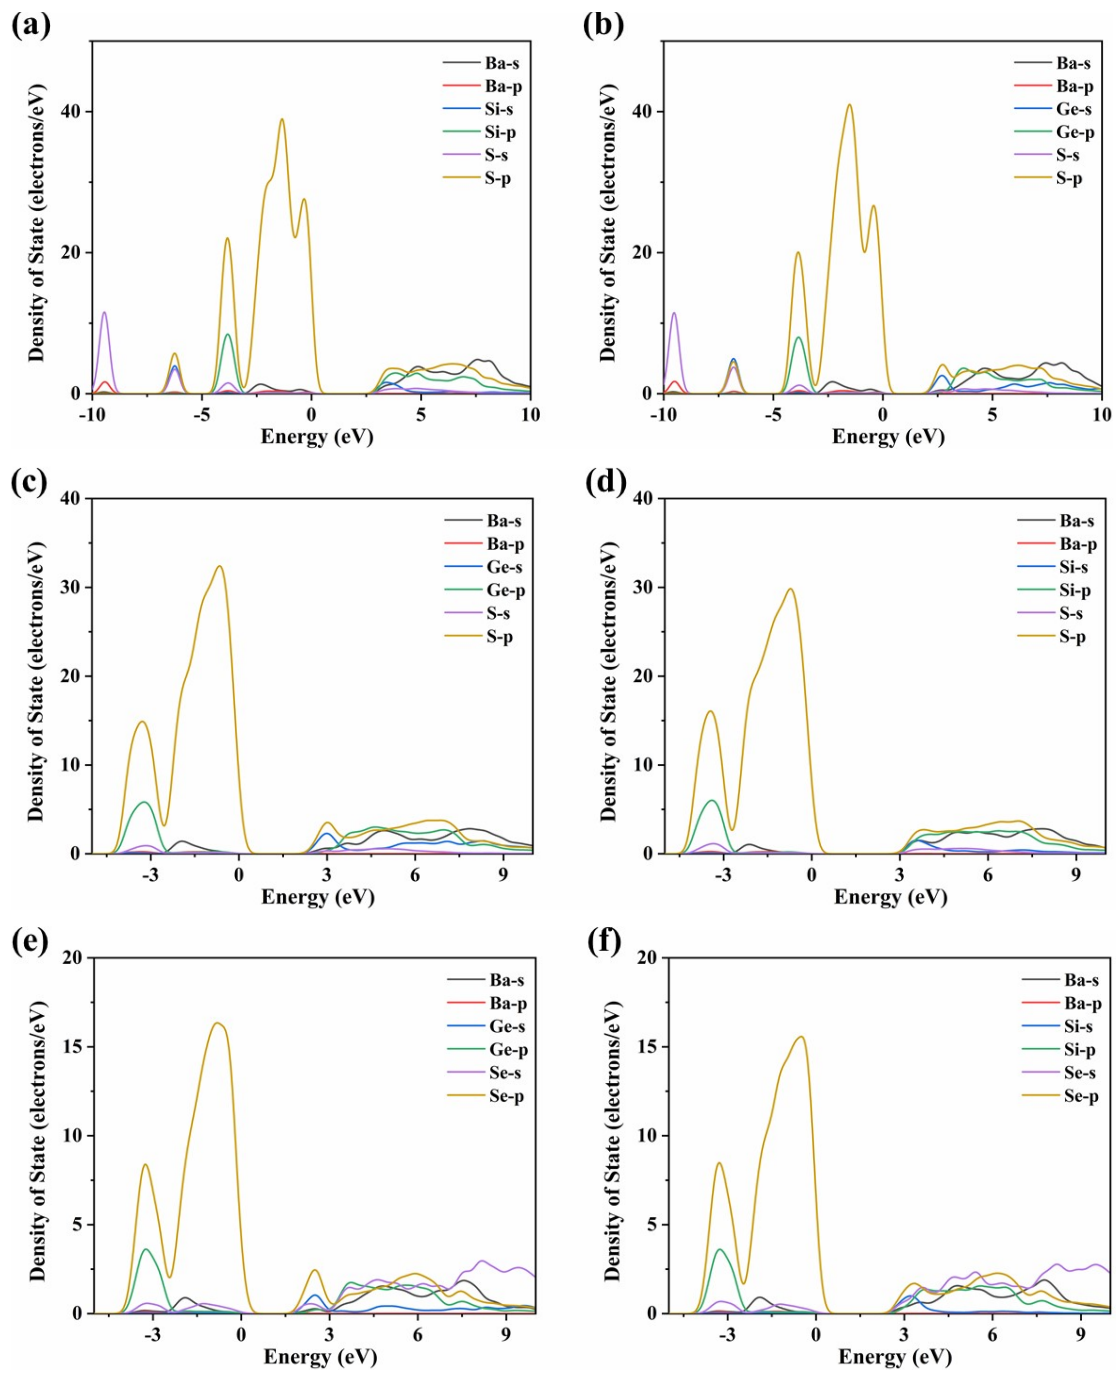

**Fig. S6** The partial density of states (PDOS) of  $\text{Ba}_3\text{SiS}_5$  (a),  $\text{Ba}_3\text{GeS}_5$  (b),  $\text{Ba}_2\text{GeS}_4$  (c),  $\text{Ba}_2\text{SiS}_4$  (d),  $\text{Ba}_2\text{GeSe}_4$  (e) and  $\text{Ba}_2\text{SiSe}_4$  (f).

## Reference

1. D. Schmitz, *Acta Cryst.*, 1981, **37**, 518-525.
2. M. Y. Pan, S. Q. Xia, X. C. Liu and X. T. Tao, *J. Solid State Chem.*, 2014, **219**, 74-79.
3. K. Wu, S. L. Pan and Z. H. Yang, *RSC Adv.*, 2015, **5**, 33646-33652.
4. J. T. Lemley, *Acta Cryst.*, 1974, **30**, 549-550.
5. A. Assoud, N. Soheilnia and H. Kleinke, *Z. Naturforsch.*, 2004, **59**, 975-979.
6. C. Brinkmann, B. Eisenmann and H. Schafer, *Z. Anorg. Allg. Chem.*, 1985, **524**, 83-89.
7. D. Johrendt and T. Markus, *Chem. Eur. J.*, 2000, **6**, 994-998.
8. M. Ribes, J. Olivier-Fourcade, E. Philippot and M. Maurin, *J. Solid State Chem.*, 1973, **8**, 195-205.
9. K. Wu, X. Su, Z. H. Yang and S. L. Pan, *Dalton Trans.*, 2015, **44**, 19856-19864.
